# Supplementary material for: Genomic and microenvironmental landscape of stage I follicular lymphoma, compared with stage III/IV
Source: PubMed Central journal article supplement — Blood Adv. 2022 Sep 26;6(18):5482–93. doi: 10.1182/bloodadvances.2022008355 (PMC9631713; doi:10.1182/bloodadvances.2022008355), 2022-09-26
Supplement: advancesADV2022008355-suppl1.pdf [file advancesADV2022008355-suppl1.pdf]

## **Supplemental Data**

### **1. Supplemental Methods**

### **2. Supplemental Figures**

supplemental Figure 1 – Kaplan Meier curve PFS and OS stage I

supplemental Figure 2 – Translocation breakpoints of BCL2 and BCL6

supplemental Figure 3 – Boxplot copy number load and number of nonsynonymous and splice site mutations per stage

supplemental Figure 4 – Analysis to determine number of clusters

supplemental Figure 5 – Barplot frequencies of the mutations and translocations per cluster stage I

supplemental Figure 6 – Boxplot copy number load per cluster

supplemental Figure 7 – Oncoprint sorted per cluster

supplemental Figure 8 – Consensus index

supplemental Figure 9 – Barplot frequencies of the mutations and translocations per cluster stage III/IV

supplemental Figure 10 – Hierarchic clustering plot stage III/IV

supplemental Figure 11– Barplot frequencies of the mutations and translocations per stage for the cases with microenvironment and NGS data complete

supplemental Figure 12 – Copy number landscape per stage for the cases with microenvironment and NGS data complete

supplemental Figure 13 – Hierarchic clustering plot per stage for the cases with microenvironment and NGS data complete

supplemental Figure 14 – Boxplots of microenvironment per cluster of follicular lymphoma

supplemental Figure 15 – Mutations in STAT6, HIST1H1C and HIST1H1E

### **3. Supplemental Tables**

supplemental Table 1 – Inclusion criteria, treatment options and follow-up per trial

supplemental Table 2 – Antibodies used for IHC microenvironment and tumor cells

supplemental Table 3 – Genes in capture panel for mutation analysis

supplemental Table 4 – Regions in capture panel for translocation analysis

supplemental Table 5 – Case overview and data availability

supplemental Table 6 – Clinical characteristics of the cases fulfilling the clinical criteria compared to cases with complete NGS-data

supplemental Table 7 – Immunohistochemistry staining results tumor cells stage I

supplemental Table 8 – Microenvironment results per cohort

supplemental Table 9 – Translocation results

supplemental Table 10 – Copy number Alteration frequencies per cohort

supplemental Table 11 – Functional somatic mutations per patient

supplemental Table 12 – Mutation frequencies per cluster

supplemental Table 13 – Microenvironment frequencies per cluster

## 1 **Supplemental Methods**

### 2 **Tissue Microarrays construction**

3 On Haematoxylin and Eosin (H&E) stained slides from the original block represented tumor  
4 areas were marked. Two one mm cores were pounced out with semi-automatically and put  
5 into the tissue microarray (TMA). Reactive tonsils or kidneys were used as controls and  
6 orientation. A standard microtome technique was used for sectioning 3 µm sections into  
7 slides, which were marked with the appropriate identification.

### 8 **Immunohistochemistry**

9 For section adhesion the TMA slides were placed in racks at 60°C overnight. For de-waxing  
10 and de-hydration slides were incubate in xylene for 2 consecutive periods of 5 minutes  
11 (min). Subsequently, slides were transferred to Industrial Methylated Spirits (IMS) solution  
12 for 5 min and further 2 periods of 5 min in hydrogen peroxide in order to dehydrate tissue  
13 and reduce non-specific staining from the action of endogenous peroxidases on the  
14 chromogen. A final incubation of 5 min in IMS and rinsing in running tap water is required  
15 prior to antigen retrieval.

16 For the first incubation steps, 3000 ml of antigen unmasking solution was warmed up in a  
17 pressure cooker. When boiling, the racks with slides were immersed and left for 10 min at  
18 high heat (120-130°C) from the time a steady flow of steam escaped the outlet valve. After  
19 that the pressure cooker was cold down and opened. Once opened the slides were cooled  
20 under cold running tap water for 5 min and then quickly transferred to a wash buffer pot  
21 ensuring the slides don't dry.

22 A hydrophobic pen marked the edge of the array field on the slides and wash buffer was  
23 applied on the array field to keep it wet throughout the remaining procedure. The DAKO  
24 Autostainer System was used for timed dispensing of reagents into the slides run for 2-3  
25 hours, according to the programmed software (Dako Autostainer Plus) for the number of  
26 slides, reagents and incubation times and rinse steps. The Super Sensitive™ Polymer-HRP  
27 IHC Detection System (Biogenex) was used for signal detection. After finishing all slides were  
28 replaced in racks and rinsed in tap water for 5 min. As a counterstain, the slides were placed

29 in haematoxylin solution for 5 min, rinsed for 2 min in running water and immersed quickly  
30 into acid alcohol solution for 5 times, after which were rinsed again for 2 min in running tap  
31 water. The slides were re-hydrated using IMS for 3 periods of 2 min and clarified by  
32 incubation in xylene baths. DPX xylene was used as mounting media, cover slips were  
33 applied without trapped air bubbles and left to dry.

34

#### 35 **Automated Image analysis using the Ariol SL-50 visual analysis software**

36

37 Slides were scanned with the Olympus BX61 microscope on an automated platform (Prior).  
38 All cores were reviewed manually to exclude cores with less than 50% of tumor tissue, due  
39 to fibrotic or necrotic areas or technical artifacts. Training was done on representative areas.  
40 Positive stained cells or areas acquire a brown/black color characteristic of DAB. To allow  
41 contrast with the background the color hue, saturation and intensity were manipulated by  
42 selection individual pixels from positive events and not included negative or non-specific  
43 stained pixels. Training improved by limiting the size and shape of the areas considered  
44 positively. This procedure was also done for identifying the negative stained cells or areas.

45

#### 46 **Automated Image analysis using the Panoramic Viewer System**

47

48 The Panoramic 250 Flash II scanner (3DHISTECH) was used for scanning the slides. Each  
49 core was observed on a computer screen using the Panoramic Viewer computer interface  
50 for bookmarking the representative tumour areas and quantify the areas of interest. After  
51 this selection, the DensitoQuant module was used to quantify the number of DAB stained  
52 pixels. Only the top red and orange levels were used for identification of stained areas. For  
53 each antibody an optimal script was saved, after adjusting the brown tolerance and the  
54 score levels, and applied for analysis the selected areas. With the system we were able to  
55 calculate the % of positive cells or positive area of the total number of cells or area in the  
56 core.

## 57 **DNA isolation and Library preparation**

58 Genomic DNA was extracted from all LLBC tumor cores with a QIAamp DNA FFPE Tissue Kit  
59 (Qiagen, Hilden, Germany) and quantified using a Qubit 2.0 Fluorometer (Thermo Fisher  
60 Scientific, Carlsbad CA, USA).<sup>1</sup> The DNA was sheared by ultrasound with a Covaris ME220  
61 (Covaris Inc, Woburn MA, USA), with settings adjusted to DNA from FFPE tissue, as  
62 previously described.<sup>2</sup> NGS-libraries were prepared with an input of 100ng sheared DNA  
63 using KAPA or KAPA Hyper Library Preparation (KAPA Biosystems, Wilmington MA, USA). In  
64 short, uniquely 8-basepairs (bp) indexed adapters (IDT, Coralville IA, USA) were ligated to the  
65 FFPE-extracted DNA, followed by purification using AMPure XP beads (Beckman Coulter,  
66 Brea CA, USA), which resulted in a fragment size in the range of 150 and 400bp.

## 67 **Shallow whole genome sequencing (WGS) and copy number analysis (CNA)**

68 For shallow WGS, 10nM of up to 24 barcoded samples NGS-libraries were equimolarly  
69 pooled and 12.5pM was loaded on one lane of a HiSeq Single End Flowcell (Illumina, San  
70 Diego CA, USA). Sequencing was performed on a HiSeq 4000 (Illumina, San Diego CA, USA) in  
71 a single-read 50-cycle run mode (SR50). Copy number analysis was performed as described  
72 previously.<sup>3,4</sup> Reads were aligned to the human reference genome build GRCh37/hg19 with  
73 BWA (v0.7.5)<sup>5,6</sup> and duplicates were marked with Picard (v2.15). Further analysis is  
74 performed in R (v3.4.1) using the Bioconductor package QDNAseq (v1.12.0)<sup>2</sup>, if a sample had  
75 two bam files these were merged by QDNAseq, then the genome was divided into  
76 nonoverlapping bins of 100kb, followed by correction of GC content and mappability.  
77 Filtering of artefacts and germline variations was performed by a previously constructed  
78 blacklist containing regions with low mappability, common germ-line copy number variants  
79 and other regions with large deviations in genomes from the 1000 Genome project.<sup>7</sup> Wave  
80 correction was performed with NoWaves (v0.6).<sup>8</sup> Based on QDNAseq segmentation created  
81 by DNACopy (v1.50.1)<sup>9</sup> ACE (v0) estimated the cellularity and absolute copy numbers.<sup>10</sup>  
82 CGHcall (v2.38.0)<sup>11</sup> used the cellularity as correction, with a minimum cellularity of 0.2, to  
83 call the CNAs. To reduce the number of data points CGHregions (v1.34) was used, with a  
84 maximal information loss of 1% allowed. Stage I and Stage III/IV follicular lymphoma (FL)  
85 were compared with CGHtest (v1.1)<sup>12</sup>, which implements a two-sided Wilcoxon Rank-Sum

86 Test with 10,000 permutations including a false discovery rate (FDR) correction for multiple  
87 testing.

88

89 **Targeted capture and deep sequencing for mutation and translocation analysis.**

90 A custom targeted panel was designed using NimbleGen design software (Roche) to detect  
91 mutations and translocations of interest. All exons of 369 genes and 12 translocation targets  
92 were captured, including genic and intergenic regions (Roche ID 43712; supplemental Table  
93 3 and 4). The panel was designed with the aim to cover most important driver genes of  
94 Follicular Lymphoma and Diffuse Large B-cell Lymphoma. Genes included in two  
95 commercially available lymphoma panels (Foundation One Hemo and HemoSeq 1.0) and  
96 genes annotated as driver genes in literature<sup>13-18</sup> The capture was performed according to  
97 NimbleGen EZ SeqCap library protocol (Roche Nimblegen, Madison WI, USA). 125ng was  
98 used from NGS-libraries to create equimolar pools with a total mass of 1µg DNA. Sequencing  
99 of the captured NGS-libraries was performed on the HiSeq 4000 (Illumina, San Diego CA,  
100 USA) in paired-end 150bp mode. This resulted in a mean target coverage of 246x. Paired-end  
101 150bp reads were de-multiplexed by Bcl2fastq (Illumina) and Seqpurge (v0.1-104) trimmed  
102 the adapter sequences.<sup>19</sup> The reads were aligned to the human reference genome  
103 (GRCh37/hg19) with BWA mem (v0.7.12).<sup>2</sup> Mapped reads were realigned with ABRA (v2.19)  
104 and picardtools MarkDuplicates (v2.4.1) marked duplicate reads<sup>20</sup>, to include secondary  
105 alignments in in the deduplication the setting ASSUME SORT ORDER=queryname was used  
106 (this is particularly important for translocation calling). Samples with a mean target coverage  
107 < 30 reads were excluded for further analysis. LoFreq (v2.1.3.1)<sup>21</sup> and Mutect2 in  
108 combination with filterMutect2 (v4.1.7.0)<sup>22</sup> were used for mutation calling using the  
109 following criteria: coverage depth >15x, minimal read and base quality >20, variant  
110 supporting reads >2 in each direction, variant allele frequency (VAF) >0.05 and the Mutect2  
111 Phred-scaled qualities that alt allele are not due to read orientation artifact (ROQ) or the Log  
112 10 likelihood ratio score of variant existing versus not existing (TLOD) must be >20 to reduce  
113 background noise. Further mutations present at least 2 times in the panel of normals (an in  
114 house AmsterdamUmc set consisting of 25 non-tumor samples (12 blood samples, 4 FFPE  
115 hyperplasia lymph node, 6 FFPE reactive lymph node and 3 FFPE epithelial tissues)).  
116 Mutations must be called by both callers to be included in further analysis.

117 Effect prediction of called variants and functional annotation was performed with  
118 Funcoator (v4.1.7.0)<sup>23</sup> and SnpSift (v.4.3)<sup>24</sup> using the database of COSMIC (v84)<sup>25</sup>, gnomAD

119 (v2.0.2)<sup>26</sup>, gencode(v19)<sup>27</sup>, dbsnp (build 151)<sup>28</sup>, clinvar (20180401)<sup>29</sup>, and the HMF panel of  
120 normals (v2.0).

121 Single nucleotide variants (SNVs) and small indels were labeled somatic if they were not  
122 common in dbsnp and not present > 3 times in the HMF panel of normals. Mutations marked  
123 by funcoator as intronic, silent, UTR or flanking mutations were removed for the analysis. All  
124 downstream analyses were performed in the custom script of programming language R  
125 (version 3.6.1). The Oncoprint is created using the ComplexHeatmap package (2.7.1.1016).<sup>30</sup>  
126 Somatic hypermutations (SHM) was called when a known target gene (*BCL2*, *BCL6*, *MYC* and  
127 *PIM1*) contained two or more mutations.

128

129 Complete-linkage hierarchical clustering was performed with the function 'hclust' of the  
130 'stats' package. Distances were defined as  $1 - \text{cor}_{\text{spearman}}$  for both the genes and the patient  
131 samples, implemented by the 'cor' function, also from the 'stats' package. Dunn-index was  
132 calculated with clValid (version 0.7.1) for determining the ratio of mean intra-cluster  
133 distances to inter-cluster distances for 2-10 clusters. Lower scores indicate a better  
134 separation of the clusters. Stability of the clustering was tested by the method described in  
135 Monti et al. (2013), performing the clustering 1000 times on 61/84 randomly selected  
136 samples, and evaluating the consensus index.<sup>31</sup> All analysis was performed in R (version  
137 3.5.1).

138 For translocation detection, four bioinformatic tools were combined including BreakMer,  
139 GRIDDS, Wham and novoBreak<sup>32-35</sup> as previously described in detail.<sup>36</sup> Translocations  
140 detected by at least two tools were visual confirmed using the Integrative Genome Viewer  
141 (IGV).<sup>37</sup>

142

#### 143 **Data availability**

144 All sequence data has been uploaded to the European Genome-phenome Archive (EGA;  
145 accession number EGAS00001005755

#### 146 **Acknowledgement:**



147 We thank the Hartwig Medical Foundation (Amsterdam, The Netherlands) for generating,  
148 analyzing and providing access to reference whole genome sequencing data of the  
149 Netherlands population.

150 1. van Essen HF, Ylstra B. High-resolution copy number profiling by array CGH using DNA  
151 isolated from formalin-fixed, paraffin-embedded tissues. *Methods Mol Biol.* 2012;838:329-  
152 341.

153 2. Scheinin I, Sie D, Bengtsson H, et al. DNA copy number analysis of fresh and formalin-  
154 fixed specimens by shallow whole-genome sequencing with identification and exclusion of  
155 problematic regions in the genome assembly. *Genome Res.* 2014;24(12):2022-2032.

156 3. Stevens WBC, Mendeville M, Redd R, et al. Prognostic relevance of CD163 and CD8  
157 combined with EZH2 and gain of chromosome 18 in follicular lymphoma: a study by the  
158 Lunenburg Lymphoma Biomarker Consortium. *Haematologica.* 2017;102(8):1413-1423.

159 4. Los-de Vries GT, de Boer M, van Dijk E, et al. Chromosome 20 loss is characteristic of  
160 breast implant-associated anaplastic large cell lymphoma. *Blood.* 2020;136(25):2927-2932.

161 5. Flicek P, Ahmed I, Amode MR, et al. Ensembl 2013. *Nucleic Acids Res.*  
162 2013;41(Database issue):D48-55.

163 6. Li H, Durbin R. Fast and accurate short read alignment with Burrows-Wheeler  
164 transform. *Bioinformatics.* 2009;25(14):1754-1760.

165 7. Genomes Project C, Abecasis GR, Auton A, et al. An integrated map of genetic  
166 variation from 1,092 human genomes. *Nature.* 2012;491(7422):56-65.

167 8. van de Wiel MA, Brosens R, Eilers PH, et al. Smoothing waves in array CGH tumor  
168 profiles. *Bioinformatics.* 2009;25(9):1099-1104.

169 9. Venkatraman ES, Olshen AB. A faster circular binary segmentation algorithm for the  
170 analysis of array CGH data. *Bioinformatics.* 2007;23(6):657-663.

171 10. Poell JB, Mendeville M, Sie D, Brink A, Brakenhoff RH, Ylstra B. ACE: absolute copy  
172 number estimation from low-coverage whole-genome sequencing data. *Bioinformatics.*  
173 2019;35(16):2847-2849.

174 11. van de Wiel MA, Kim KI, Vosse SJ, van Wieringen WN, Wilting SM, Ylstra B. CGHcall:  
175 calling aberrations for array CGH tumor profiles. *Bioinformatics.* 2007;23(7):892-894.

176 12. van de Wiel MA, Smeets SJ, Brakenhoff RH, Ylstra B. CGHMultiArray: exact P-values  
177 for multi-array comparative genomic hybridization data. *Bioinformatics.* 2005;21(14):3193-  
178 3194.

179 13. Zhang J, Grubor V, Love CL, et al. Genetic heterogeneity of diffuse large B-cell  
180 lymphoma. *Proc Natl Acad Sci U S A.* 2013;110(4):1398-1403.

181 14. Morin RD, Mendez-Lago M, Mungall AJ, et al. Frequent mutation of histone-  
182 modifying genes in non-Hodgkin lymphoma. *Nature.* 2011;476(7360):298-303.

183 15. Lohr JG, Stojanov P, Lawrence MS, et al. Discovery and prioritization of somatic  
184 mutations in diffuse large B-cell lymphoma (DLBCL) by whole-exome sequencing. *Proc Natl*  
185 *Acad Sci U S A.* 2012;109(10):3879-3884.

186 16. Pasqualucci L, Trifonov V, Fabbri G, et al. Analysis of the coding genome of diffuse  
187 large B-cell lymphoma. *Nat Genet.* 2011;43(9):830-837.

188 17. Pastore A, Jurinovic V, Kridel R, et al. Integration of gene mutations in risk  
189 prognostication for patients receiving first-line immunochemotherapy for follicular  
190 lymphoma: a retrospective analysis of a prospective clinical trial and validation in a  
191 population-based registry. *Lancet Oncol.* 2015;16(9):1111-1122.

192 18. Pasqualucci L, Khiabanian H, Fangazio M, et al. Genetics of follicular lymphoma  
193 transformation. *Cell Rep.* 2014;6(1):130-140.

194 19. Sturm M, Schroeder C, Bauer P. SeqPurge: highly-sensitive adapter trimming for  
195 paired-end NGS data. *BMC Bioinformatics.* 2016;17:208.

196 20. Mose LE, Wilkerson MD, Hayes DN, Perou CM, Parker JS. ABRA: improved coding  
197 indel detection via assembly-based realignment. *Bioinformatics*. 2014;30(19):2813-2815.

198 21. Wilm A, Aw PP, Bertrand D, et al. LoFreq: a sequence-quality aware, ultra-sensitive  
199 variant caller for uncovering cell-population heterogeneity from high-throughput sequencing  
200 datasets. *Nucleic Acids Res*. 2012;40(22):11189-11201.

201 22. Cibulskis K, Lawrence MS, Carter SL, et al. Sensitive detection of somatic point  
202 mutations in impure and heterogeneous cancer samples. *Nat Biotechnol*. 2013;31(3):213-  
203 219.

204 23. McKenna A, Hanna M, Banks E, et al. The Genome Analysis Toolkit: a MapReduce  
205 framework for analyzing next-generation DNA sequencing data. *Genome Res*.  
206 2010;20(9):1297-1303.

207 24. Cingolani P, Patel VM, Coon M, et al. Using *Drosophila melanogaster* as a model for  
208 genotoxic chemical mutational studies with a new program, SnpSift. *Frontiers in Genetics*.  
209 2012;3(MAR):35-35.

210 25. Tate JG, Bamford S, Jubb HC, et al. COSMIC: the Catalogue Of Somatic Mutations In  
211 Cancer. *Nucleic Acids Res*. 2019;47(D1):D941-D947.

212 26. Karczewski KJ, Francioli LC, Tiao G, et al. The mutational constraint spectrum  
213 quantified from variation in 141,456 humans. *Nature*. 2020;581(7809):434-443.

214 27. Frankish A, Diekhans M, Ferreira AM, et al. GENCODE reference annotation for the  
215 human and mouse genomes. *Nucleic Acids Res*. 2019;47(D1):D766-D773.

216 28. Sherry ST, Ward MH, Kholodov M, et al. dbSNP: the NCBI database of genetic  
217 variation. *Nucleic Acids Res*. 2001;29(1):308-311.

218 29. Landrum MJ, Lee JM, Benson M, et al. ClinVar: improving access to variant  
219 interpretations and supporting evidence. *Nucleic Acids Res*. 2018;46(D1):D1062-D1067.

220 30. Gu Z, Eils R, Schlesner M. Complex heatmaps reveal patterns and correlations in  
221 multidimensional genomic data. *Bioinformatics*. 2016;32(18):2847-2849.

222 31. Monti S, Tamayo P, Mesirov J, Golub T. Consensus Clustering: A Resampling-Based  
223 Method for Class Discovery and Visualization of Gene Expression Microarray Data. *Machine*  
224 *Learning*. 2003;52(July):91-118.

225 32. Abo RP, Ducar M, Garcia EP, et al. Breakmer: detection of structural variation in  
226 targeted massively parallel sequencing data using kmers. *Nucleic Acids Res*. 2015;43(3):e19.

227 33. Cameron DL, Schroder J, Penington JS, et al. GRIDSS: sensitive and specific genomic  
228 rearrangement detection using positional de Bruijn graph assembly. *Genome Res*.  
229 2017;27(12):2050-2060.

230 34. Kronenberg ZN, Osborne EJ, Cone KR, et al. Wham: Identifying Structural Variants of  
231 Biological Consequence. *PLoS Comput Biol*. 2015;11(12):e1004572.

232 35. Chong Z, Ruan J, Gao M, et al. novoBreak: local assembly for breakpoint detection in  
233 cancer genomes. *Nat Methods*. 2017;14(1):65-67.

234 36. Allahyar A, Pieterse M, Swennenhuis J, et al. Robust detection of translocations in  
235 lymphoma FFPE samples using targeted locus capture-based sequencing. *Nat Commun*.  
236 2021;12(1):3361.

237 37. Thorvaldsdottir H, Robinson JT, Mesirov JP. Integrative Genomics Viewer (IGV): high-  
238 performance genomics data visualization and exploration. *Brief Bioinform*. 2013;14(2):178-  
239 192.

240

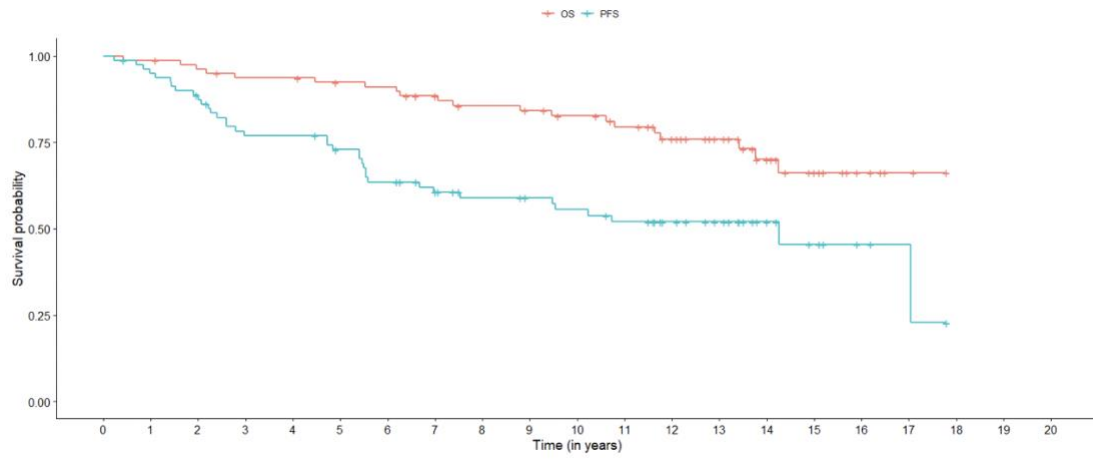

241

242 **Supplemental Figure 1 – Kaplan Meier curve PFS (blue line) and OS (red line) stage I**

243 **A**

Stage I – BCL2 region

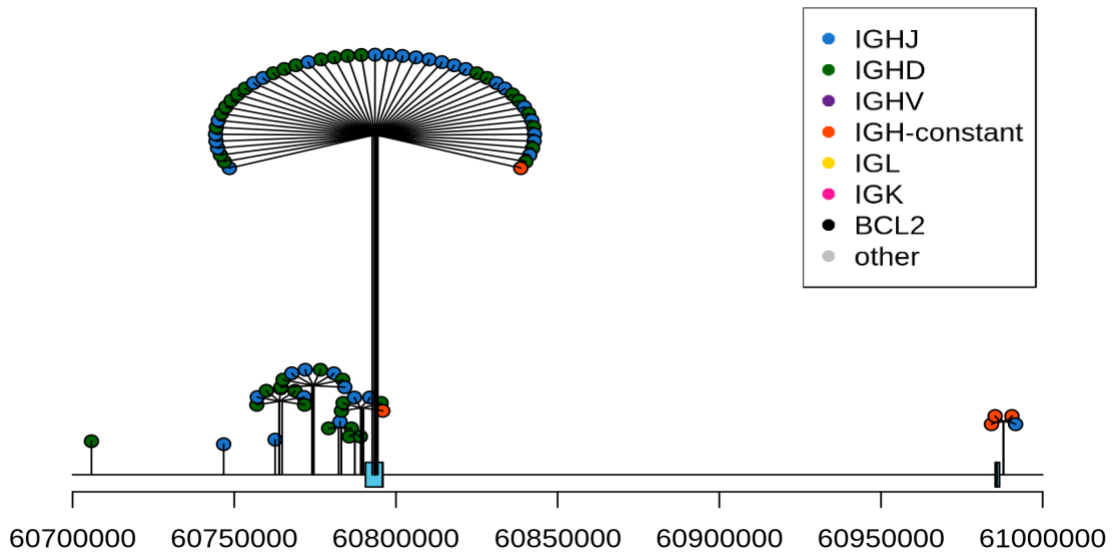

246 **B**

Stage III/IV – BCL2 region

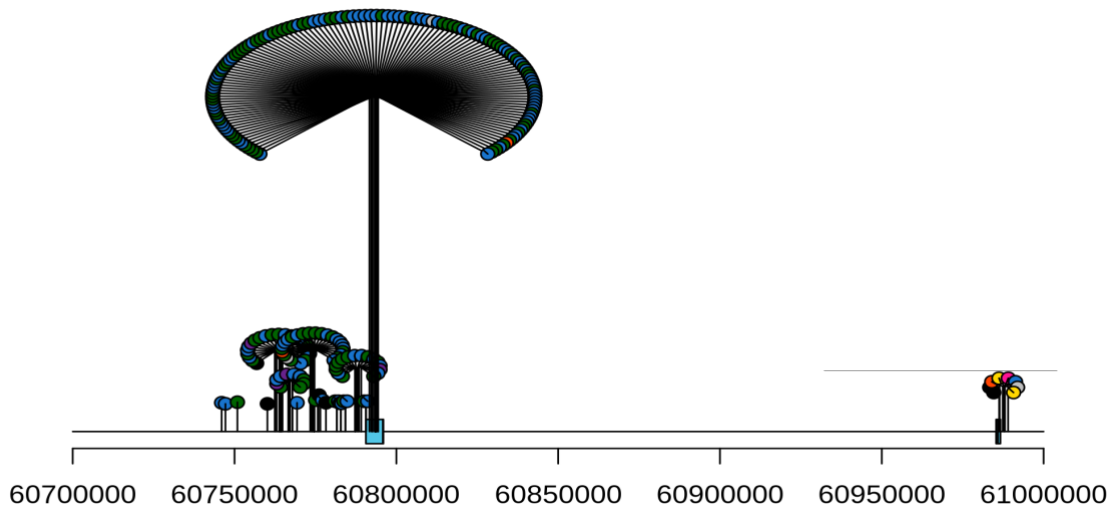

249 C

Stage I - zoomed BCL2 exon 3 including MBR and downstream region

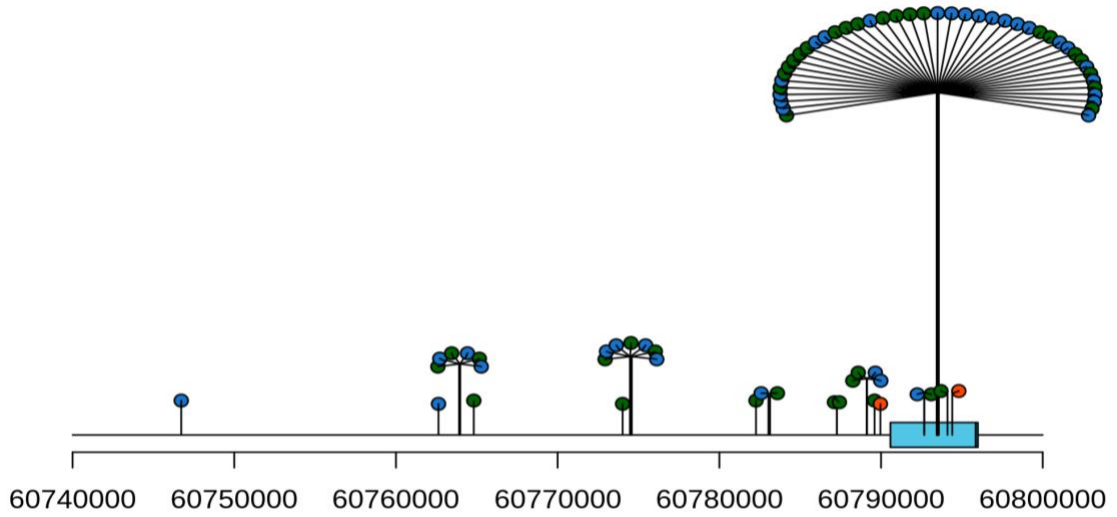

250  
251

252 D

Stage III/IV - zoomed BCL2 exon 3 including MBR and downstream region

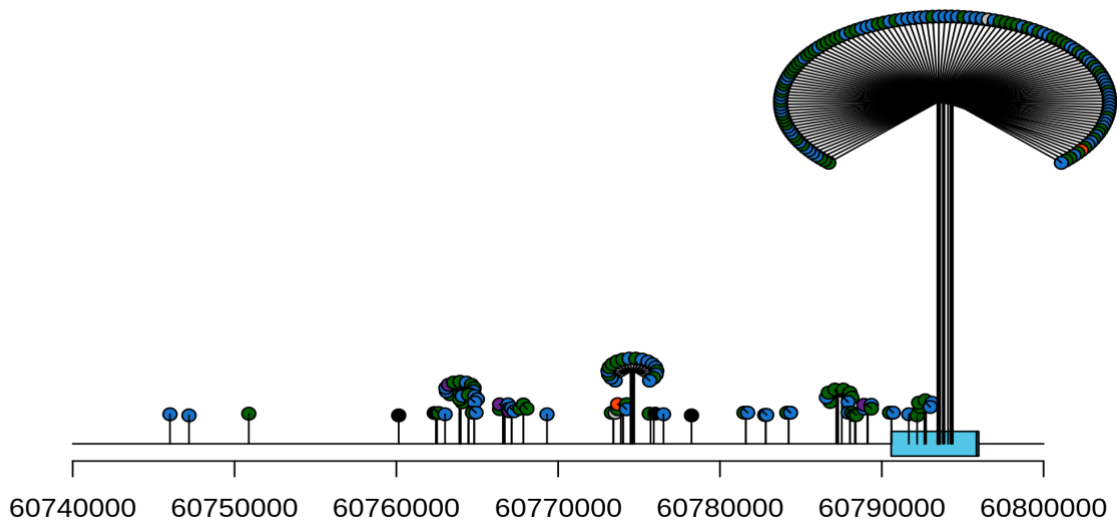

253  
254

255 E

Stage I - zoomed BCL2 exon 1 and 2 and upstream region

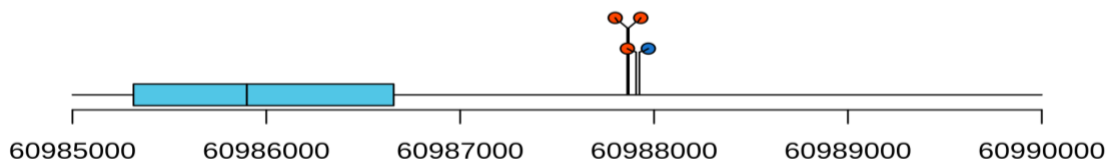

256  
257

258 F

Stage III/IV - zoomed BCL2 exon 1 and 2 and upstream region

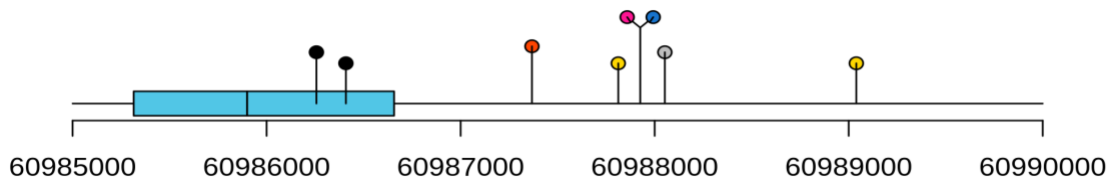

259  
260  
261

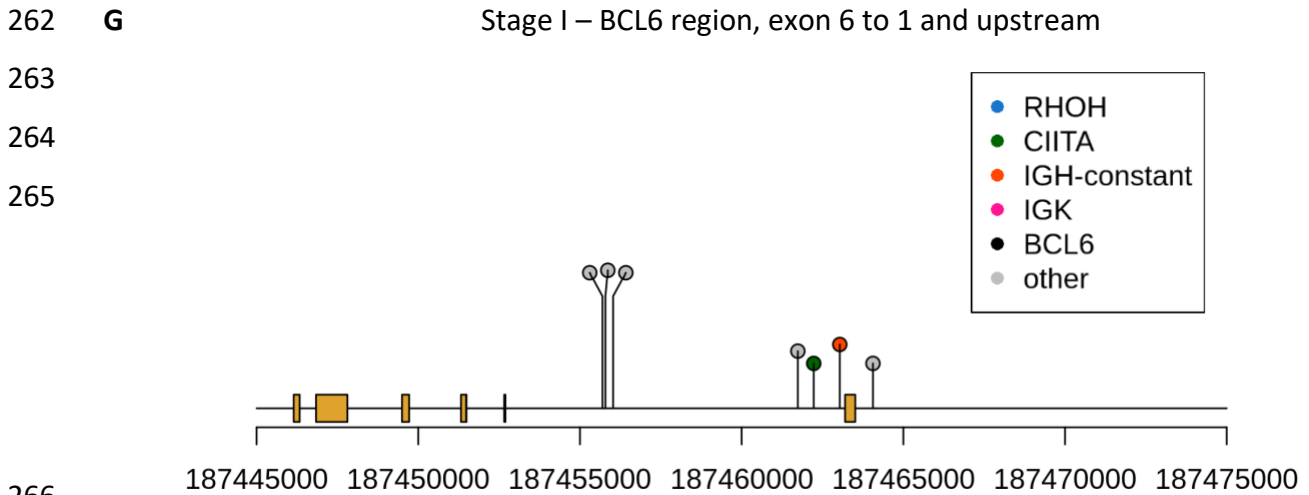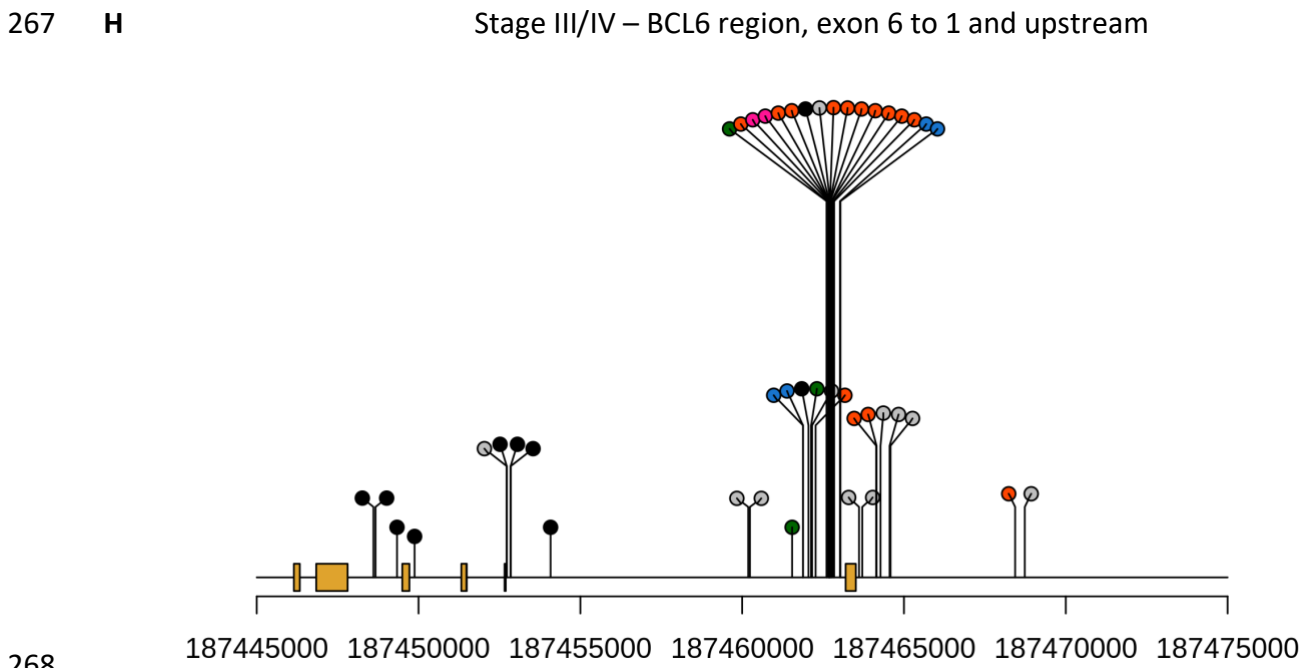

269 **Supplemental Figure 2 - Translocation breakpoints of BCL2 and BCL6**

270 Breakpoints are depicted on chromosomal region around BCL2 and BCL6, x-axis represent

271 the position on the chromosome (hg19). Each pin is a unique breakpoint, of most samples 2

272 breakpoints are depicted, which represent both sides of the translocation breakpoint. The

273 colours represent the partner gene of the translocation indicated in the legends of **A** and **G**.

274 Stage I and Stage III and IV are depicted in separate figures indicated above. **A-B** entire BCL2

275 gene with surrounding region of chromosome 18, BCL2 exons are indicated in blue. **C-D**

276 Zoomed region of exon 3 including the Major breakpoint region (MBR) of BCL2 indicated in

277 blue and the downstream region. **E-F** Zoomed region of exon 1 and 2 of BCL2 indicated in

278 blue and the upstream region. **G-H** exon 6 to 1 of BCL6 indicated in yellow with the

279 upstream region on chromosome 3.

280

281 A

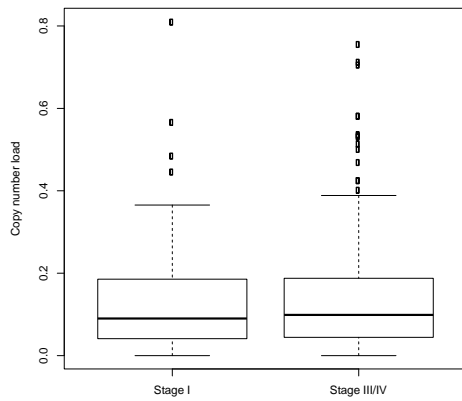

B

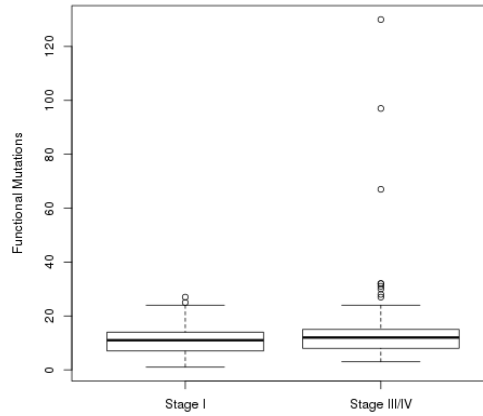

282  
283

284 **Supplemental Figure 3 – Boxplot copy number load and number of nonsynonymous and**  
285 **splice site mutations per stage**

286 **A:** The copy number load per stage depicted as boxplot stage I (n=82) median 0.09 (mean  
287 0.13) stage III/IV (n=139) median 0.10 (mean 0.15) (p=0.52) and **B:** The number of  
288 nonsynonymous and splice site mutations per stage depicted as boxplots. Stage I (n=82)  
289 median =11 (mean 11.1) stage III/IV (n=139) median=12 (mean 14.1) (p=0.28)  
290



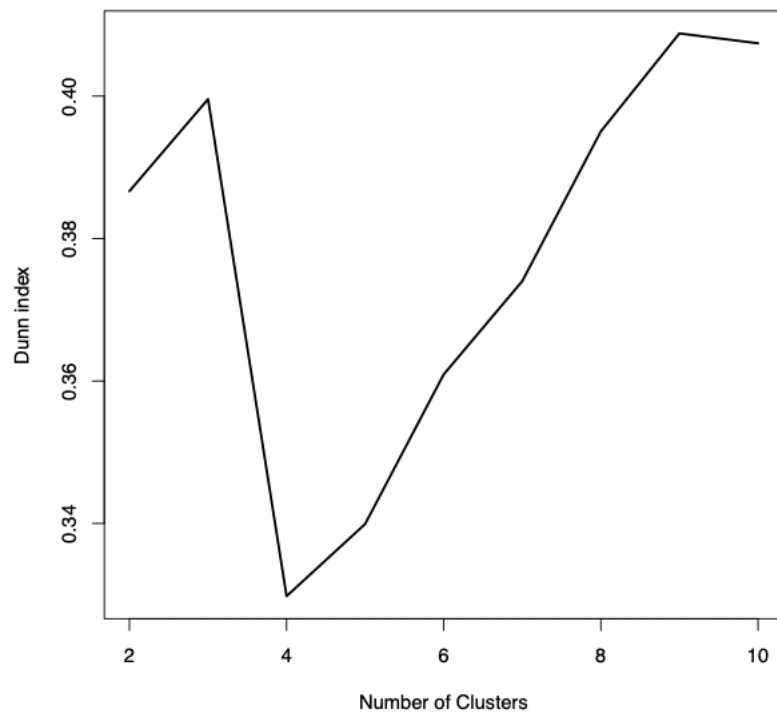

291

292

293 **Supplemental Figure 4 – Analysis to determine number of clusters.**

294 Dunn index (y-axis) versus number of clusters (x-axis) for stage I

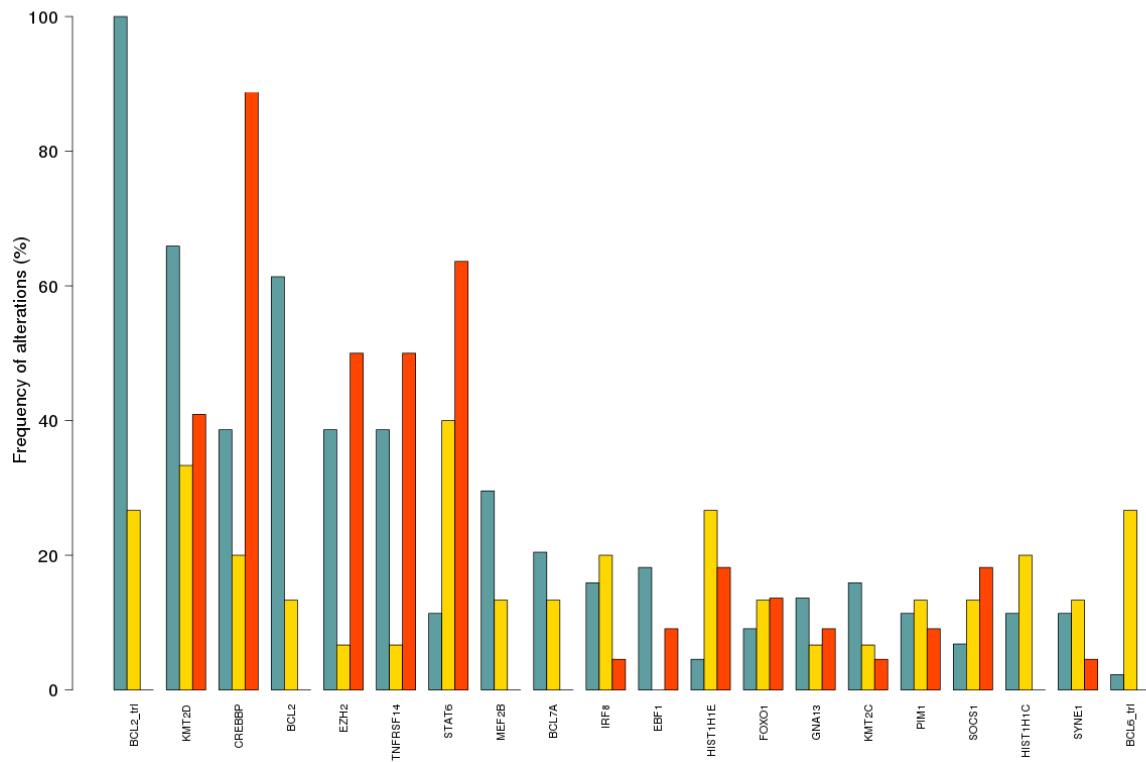

296  
 297  
 298  
 299  
 300  
 301  
 302

**Supplemental Figure 5 – Barplot frequencies of the mutations and translocations per cluster stage I**

frequency of BCL2 and BCL6 translocations and top 20 mutated genes depicted, stage I CL1 (green, n=44), CL2 (yellow, n=15) and CL3 (orange, n=22).

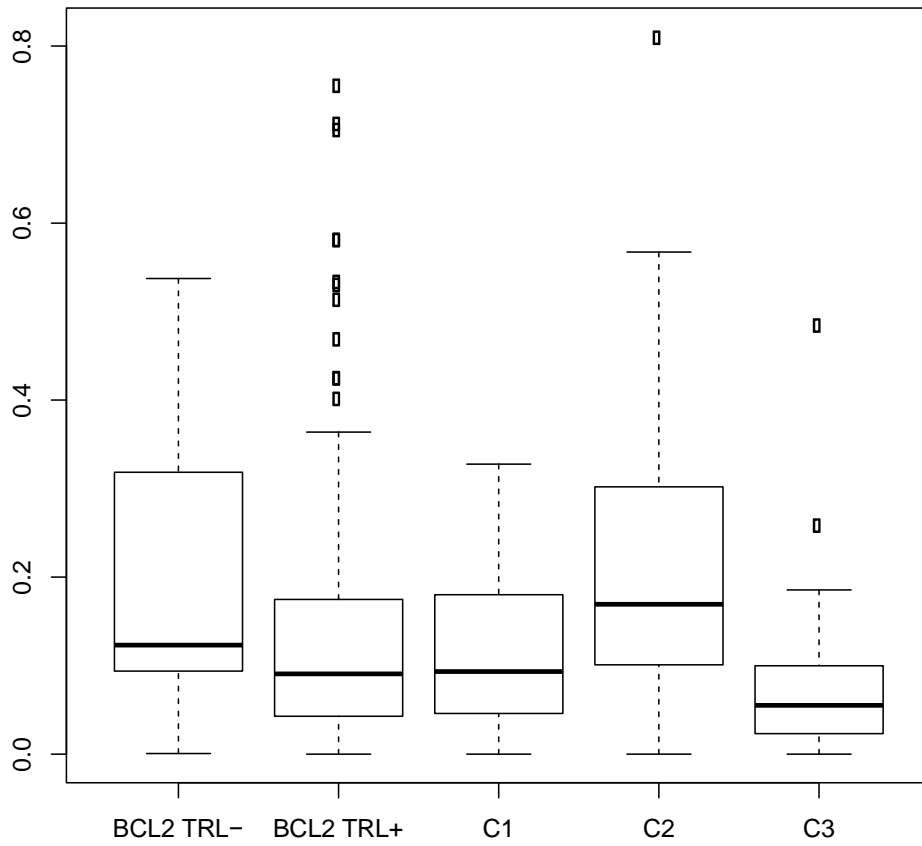

303

304 **Supplemental Figure 6 – Boxplot copy number load per cluster**

305 The % of CNA per cluster depicted as boxplots. Stage III/IV BCL2tr+ (n=128), stage III/IV

306 BCL2tr- (n=11) and stage I: CL1 (n=44), CL2 (n=15) and CL3 (n=22)

307

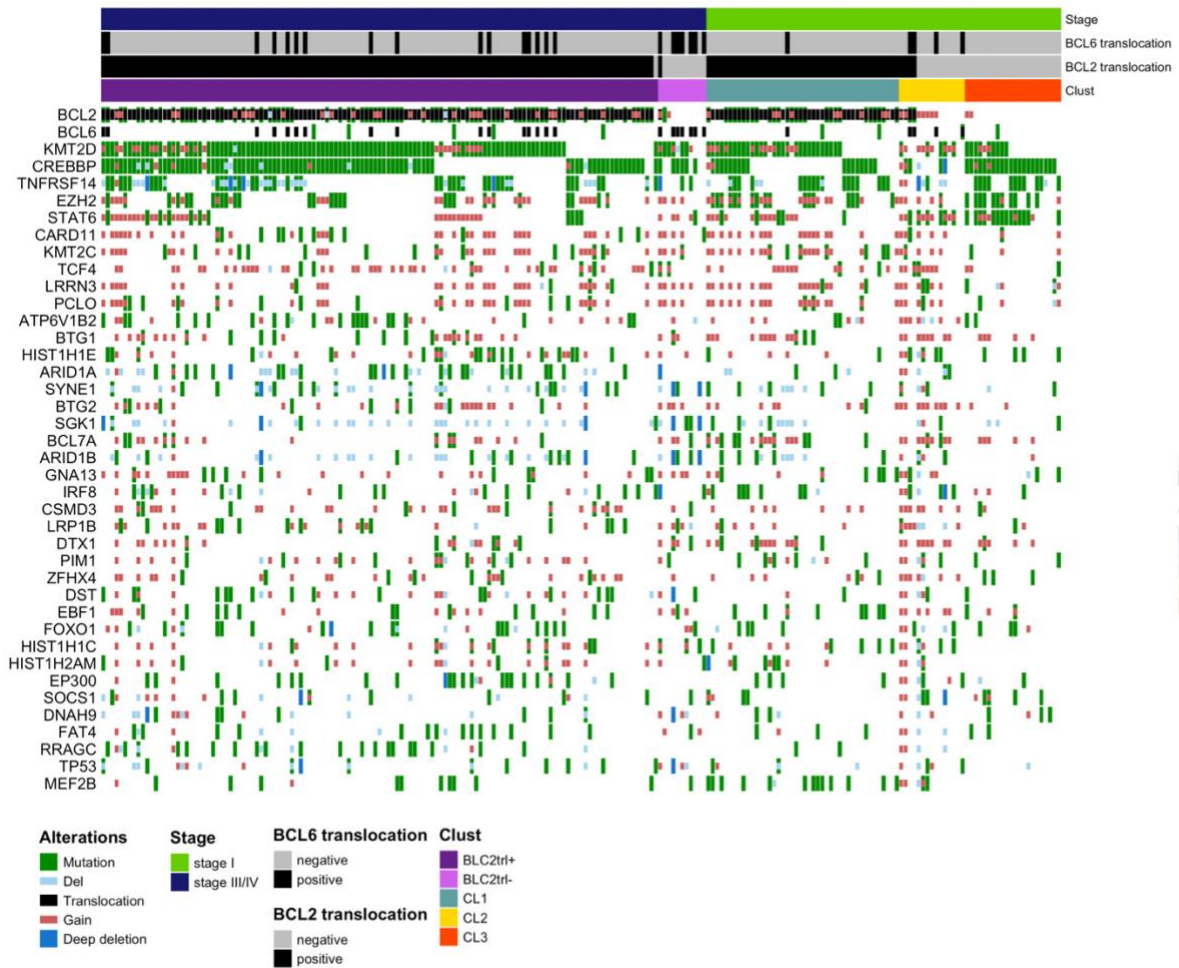

308

309 **Supplemental Figure 7 – Oncoprint sorted per cluster**

310 Distribution of mutations of the top 40 mutated genes stage I (n=81) and stage III/IV  
 311 (n=139). Each column represents an individual case, stage III/IV BLC2tr+ (dark purple,  
 312 n=128), stage III/IV BLC2tr- (light purple, n=11), CL1 (green, n=44), CL2(yellow, n=15) and  
 313 CL3(orange, n=22). Each row represents a genes ordered based of frequency of mutations  
 314 appearing within the whole cohort. Alterations are color-coded as indicated in the figure.

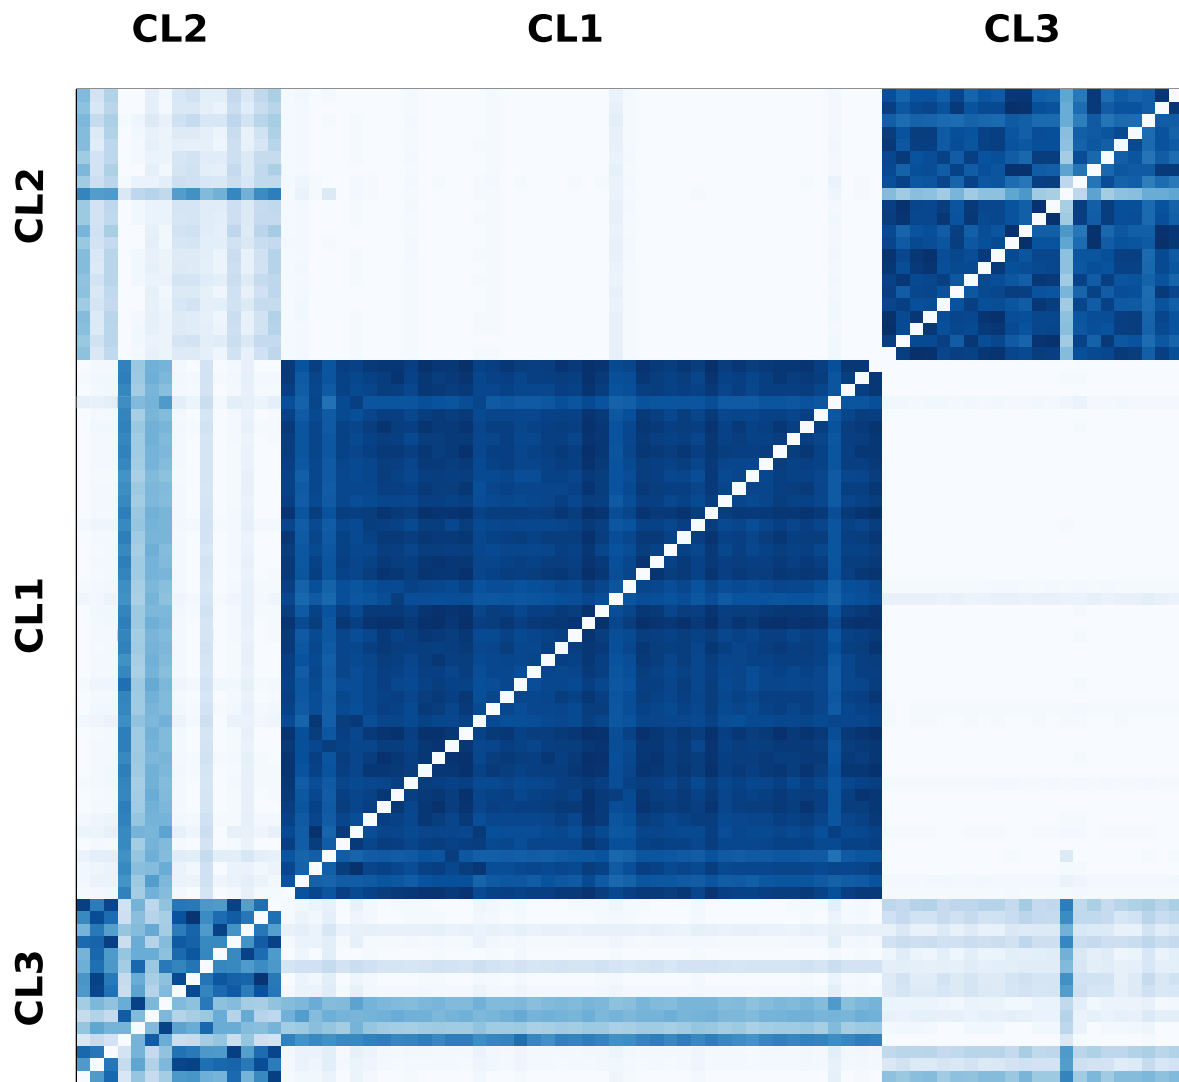

315

316 **Supplemental Figure 8 – Consensus index**

317 Stability analysis of the stage I clustering. Colours indicate probability of co-clustering of two  
 318 samples, from 0 to 1 (consensus index). A clear separation between the clusters is found.

319

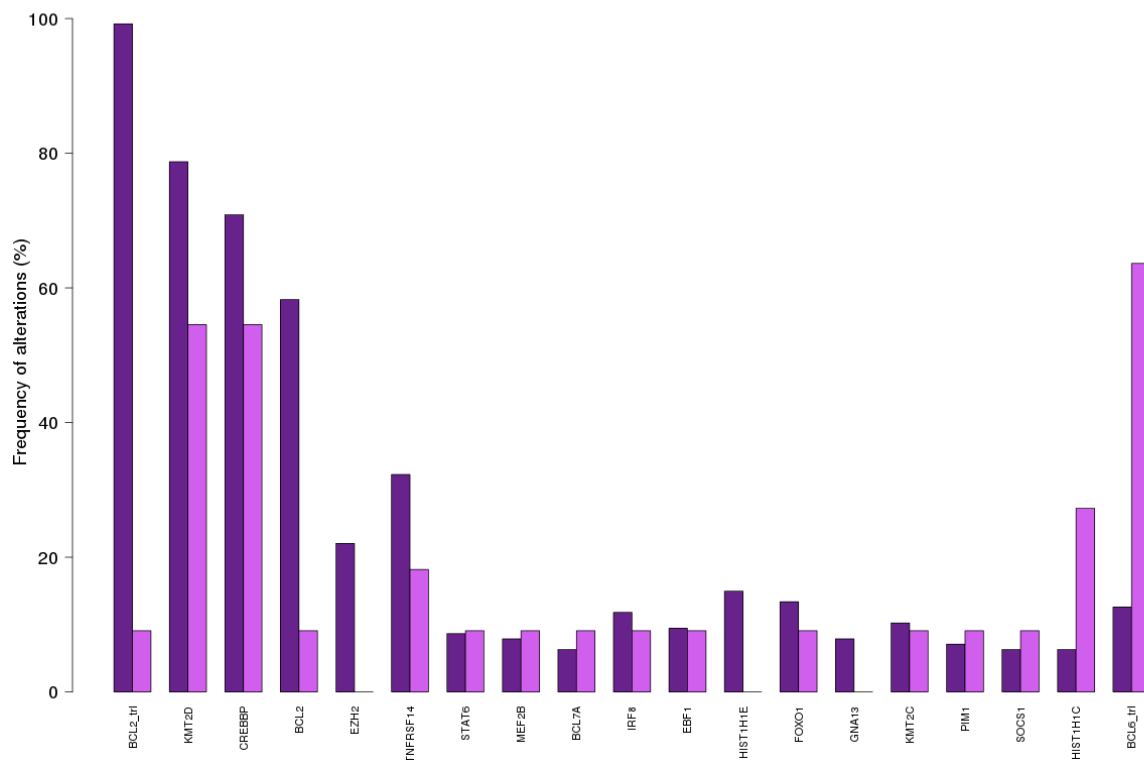

320  
321  
322  
323  
324

**Supplemental Figure 9 – Barplot frequencies of the mutations and translocations per cluster stage III/IV**

frequency of BCL2 and BCL6 translocations and top 20 mutated genes depicted, Stage III/IV BCL2trl+ (dark purple, n=128), stage III/IV BCL2trl- (light purple, n=11).

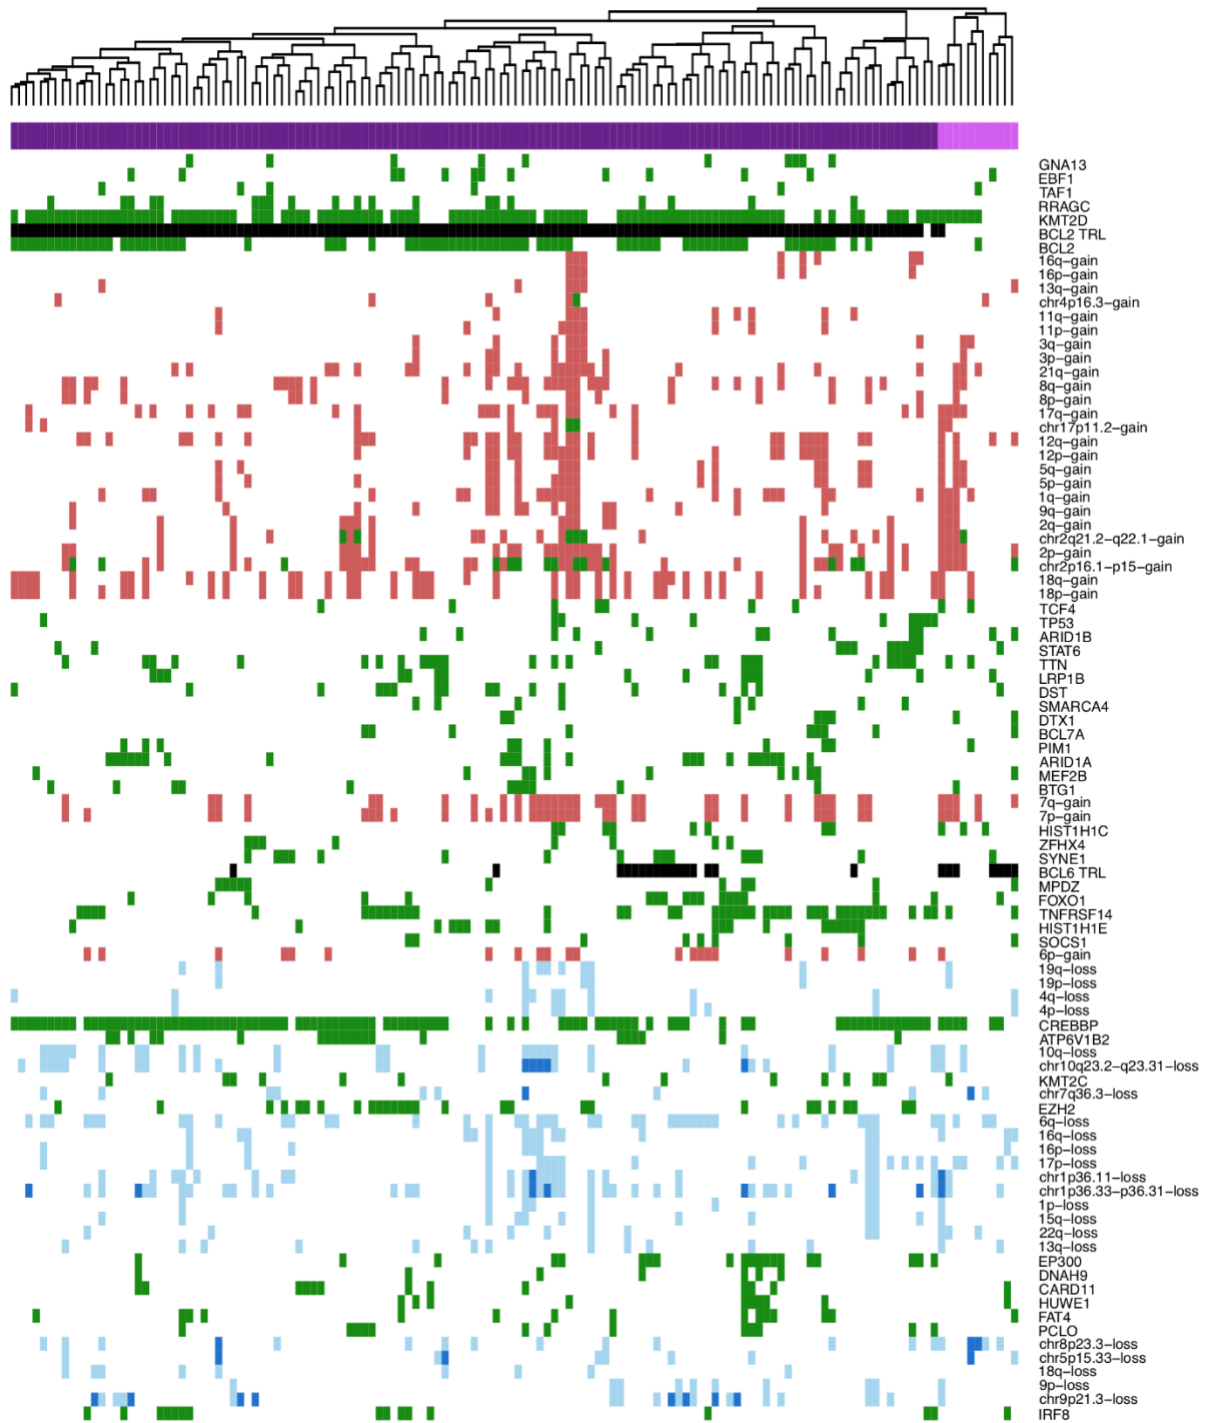

326

327 **Supplemental Figure 10 – Hierarchic clustering plot stage III/IV**

328 Features of stage III/IV (n=139) included in unsupervised hierarchical clustering are somatic  
 329 mutations present in more than 5% of the cases, BCL2 and BCL6 translocations, and focal  
 330 and chromosomal arm level aberrations present in more than 5% of the samples with  
 331 Spearman correlation. Each column represents one patient, stage III/IV BCL2trl+ (dark  
 332 purple, n=128) and stage III/IV BCL2trl- (light purple, n=11). Mutations (green),  
 333 translocations (turquoise) and copy number aberrations (gains=red, losses=light blue and  
 334 multiple losses=dark blue) are ordered in rows.

335

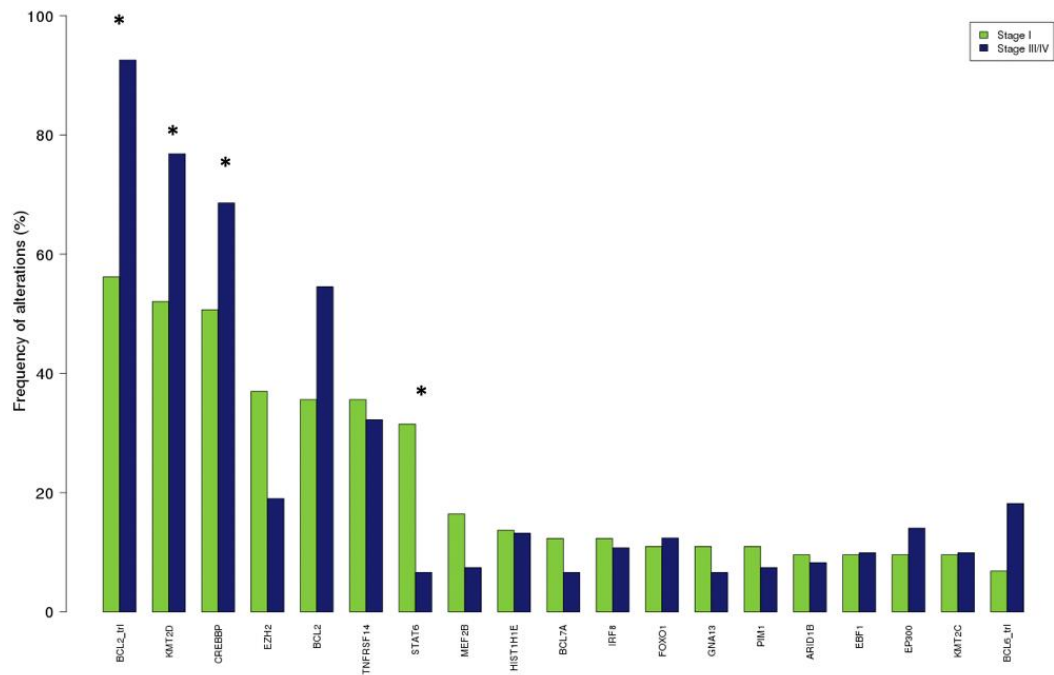

336  
 337 **Supplemental Figure 11 – Barplot frequencies of the mutations and translocation per stage**  
 338 **for the cases with microenvironment and NGS data complete**  
 339 frequency of *BCL2* and *BCL6* translocations and top 20 mutated genes according to stage I in  
 340 green (n=73) and stage III/IV in blue (n=120), significant differences are indicated by  
 341 \* $q < 0.05$ , (Fisher-exact test and false discovery rate using Benjamini & Hochberg method)



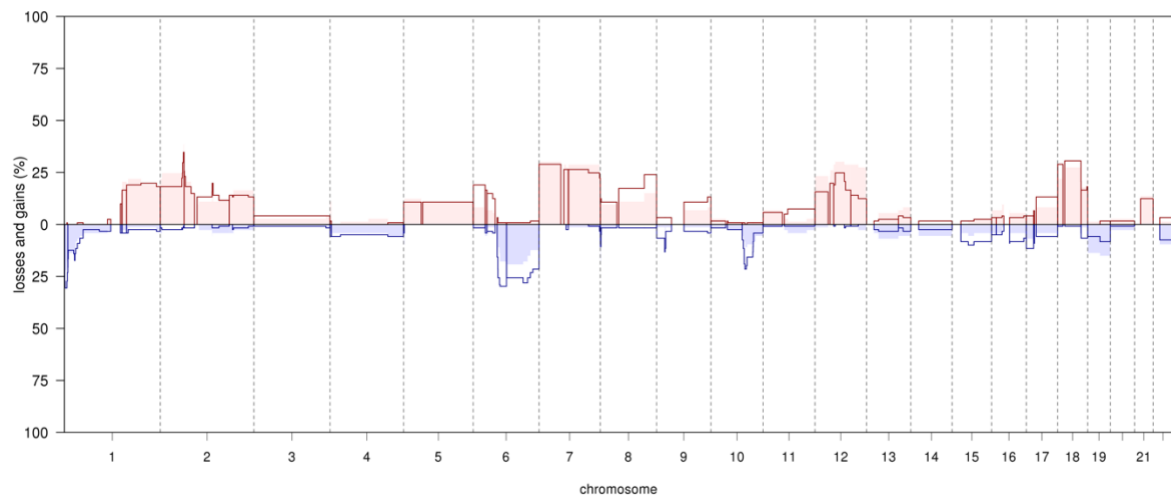

342

343 **Supplemental Figure 12 – Copy number landscape per stage for the cases with**

344 **microenvironment and NGS data complete**

345 comparison plots for CNAs between stage I as filled areas (n=73) and stage III/IV as lines

346 (n=120) are percentages of the number of cases with gains (positive value red) and losses

347 (negative value blue), sorted for chromosome position (x-axis)

348 **A**

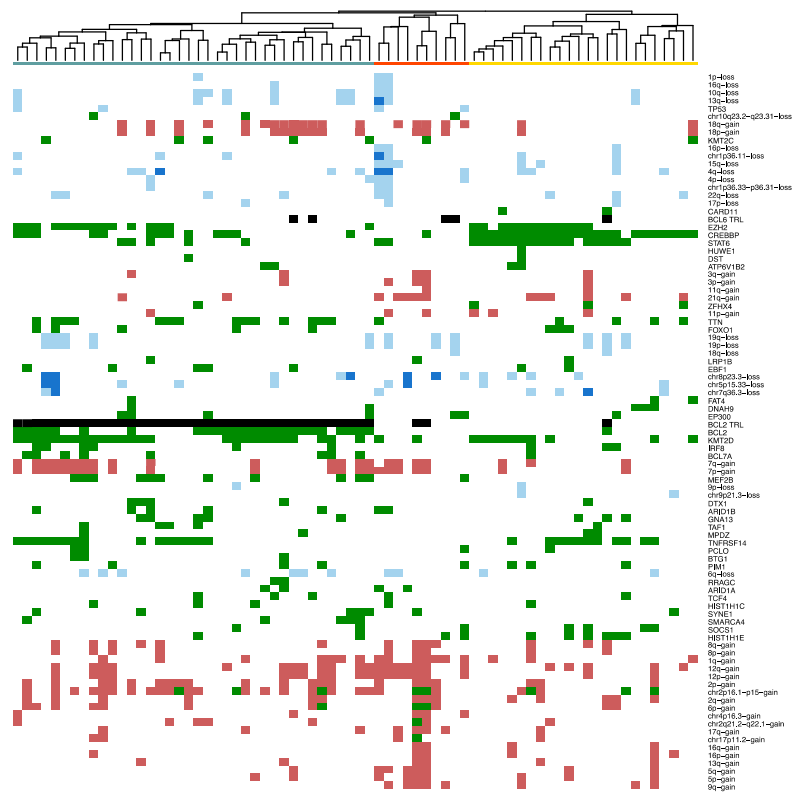

349

350 **B**

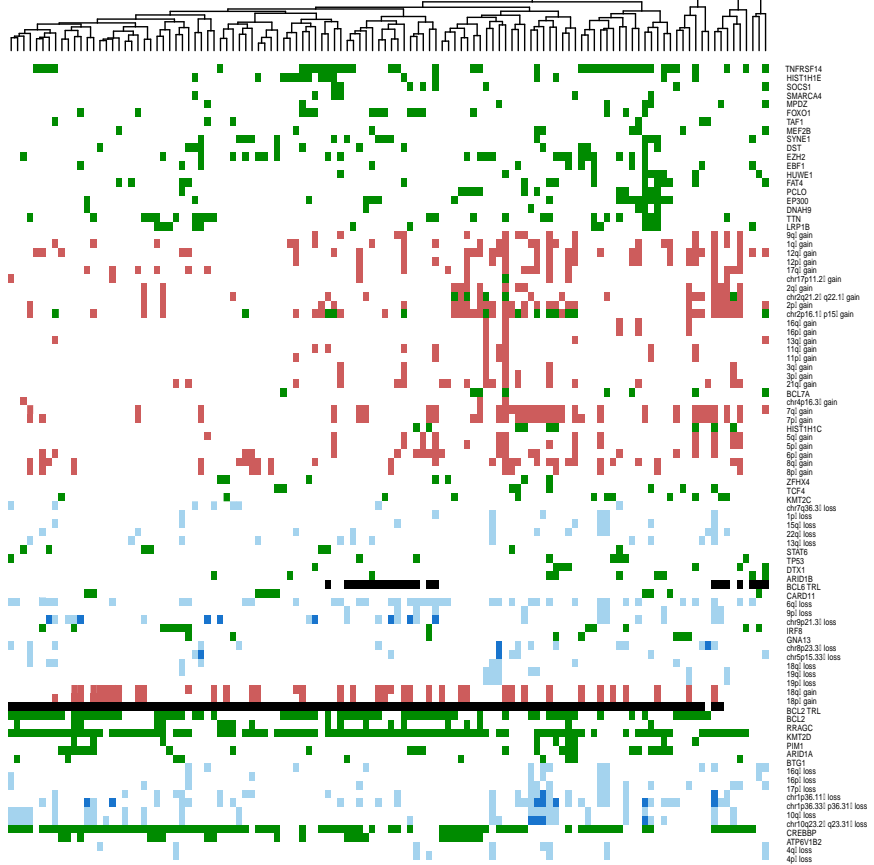

351

352 **Supplemental Figure 13 – Hierarchical clustering plot for the cases with microenvironment**  
353 **and NGS data complete**

354 **A:** Features of stage I (n=72) **B:** Features of stage III/IV (n=120) included in unsupervised  
355 hierarchical clustering are somatic mutations present in more than 5% of the cases, BCL2  
356 and BCL6 translocations, and focal and chromosomal arm level aberrations present in more  
357 than 5% of the samples with Spearman correlation. Each column represents one patient,  
358 stage I; cluster 1 (CL1) (green, n=38), cluster 2 (CL2) (yellow, n=10) and cluster 3 (CL3)  
359 (orange, n=24). stage III/IV; BCL2trl+ (dark purple, n=111) and stage III/IV BCL2trl- (light  
360 purple, n=9). Mutations (green), translocations (turquoise) and copy number aberrations  
361 (gains=red, losses=light blue and multiple losses=dark blue) are ordered in rows

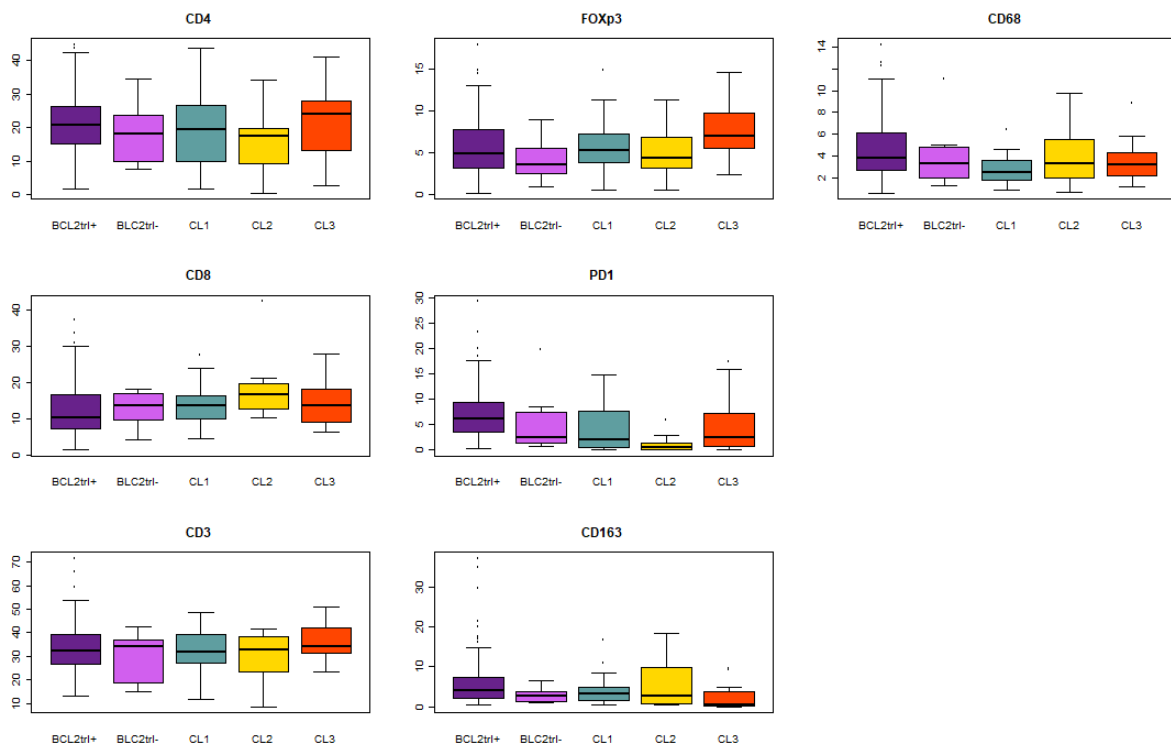

363

364

### Supplemental Figure 14 - boxplots of microenvironment per cluster of follicular lymphoma

365

For CD4, CD8, CD3, FOXP3 and PD1 the percentage of positive nucleated cells of all

366

nucleated cells are depicted as boxplots and for CD163 and CD68 the percentage of positive

367

area of the total cell area computer assisted scored are plotted in the boxplots with 25<sup>th</sup> and

368

75<sup>th</sup> percentile. Stage III/IV BCL2tr+ (dark purple, n=107), stage III/IV BCL2tr- (light purple, n=7),

369

CL1 (green, n=37), CL2 (yellow, n=11) and CL3 (orange, n=21).

370 A  
371

### Stage I

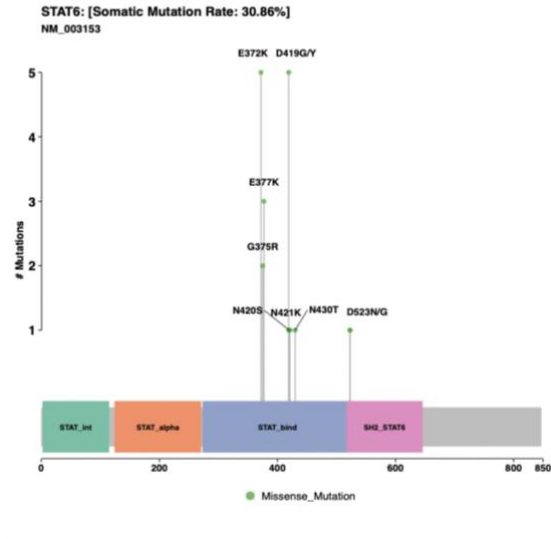

B

### Stage III/IV

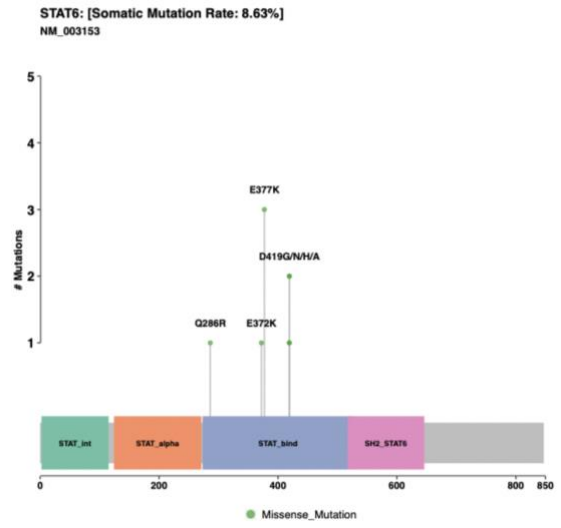

373

374 C

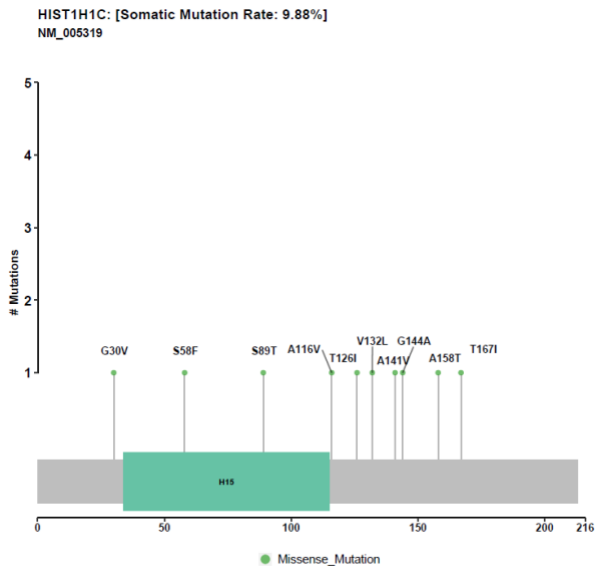

D

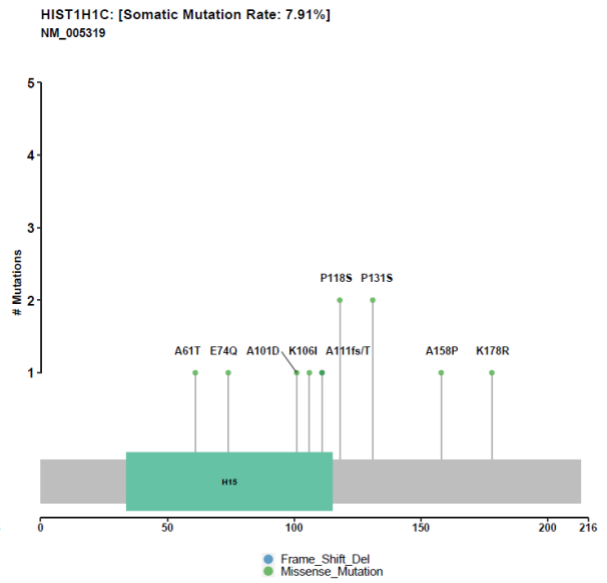

375

376 E

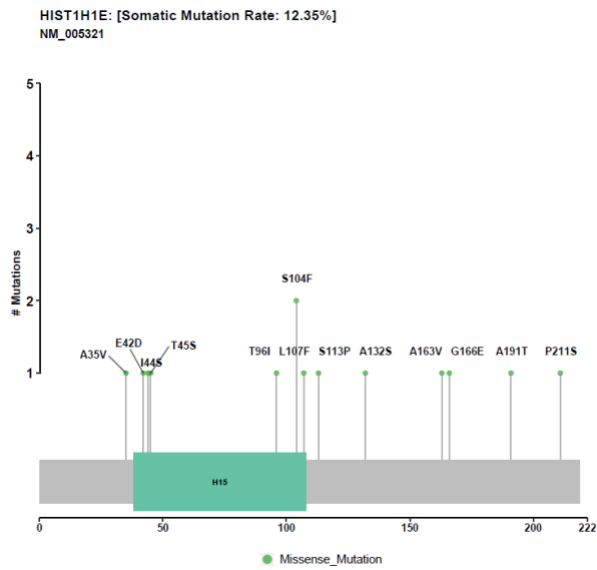

F

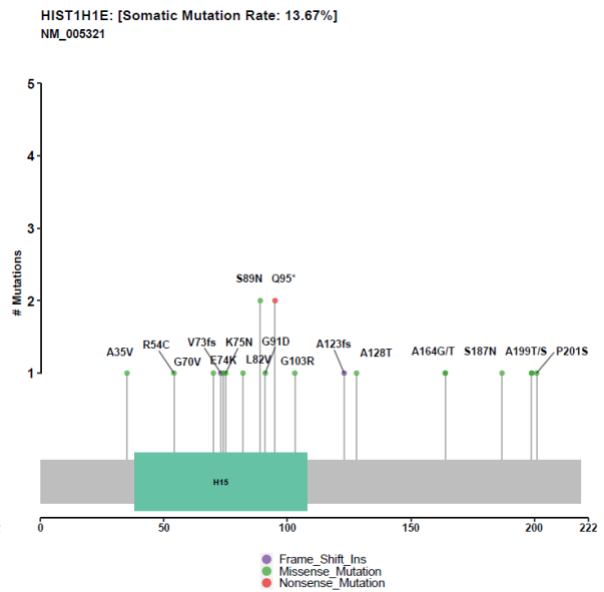

377

378 **Supplemental Figure 15 – Mutations in STAT6, HIST1H1C and HIST1H1E**

379 **A/B.** STAT6 per stage, hotspot mutations are E262K/A, E267K/A and D309G/N/H/V/Y/A

380 Missense mutations are depicted in green, frame shift mutations in purple and nonsense

381 mutations in red. Mutations are visualized by Mutation Mapper from cBioPortal

382 ([https://www.cbioportal.org/mutation\\_mapper](https://www.cbioportal.org/mutation_mapper))

383 **C/D.** HIST1H1C mutations per stage, dispersed pattern suggesting loss of function mutations.

384 **E/F** HIST1H1E mutations per stage, dispersed pattern suggesting loss of function mutations
